# Supplementary material for: Oxygen redox activities governing high-voltage charging reversibility of Ni-rich layered cathodes
Source: Royal Society of Chemistry journal article supplement (doi:10.1039/d4ee03832k), 2024-01-01
Supplement: d4ee03832k1.pdf [file d4ee03832k1.pdf]

Supporting information

# Oxygen Redox Activities Governing High-Voltage Charging Reversibility of Ni-Rich Layered Cathodes

## Table of contents

### Materials and methods

#### Figures S1-S12

Fig. S1. Rietveld refinement results of neutron diffraction patterns of NR-NCMs

Fig. S2. Ni- $L_3$  TFY spectra of NR-NCMs and their fits

Fig. S3. Co- $L_3$  TFY spectra of NR-NCMs

Fig. S4. Ni- $L_3$  TEY spectra of NR-NCMs and their fits

Fig. S5. Co- $L_3$  TEY spectra of NR-NCMs

Fig. S6. Mn- $L_3$  iPFY spectra of NR-NCMs

Fig. S7. Additional mRIXS spectra of NR-NCMs at various states of charge

Fig. S8. Ni- $L_3$  TFY spectra of NR-NCMA and their fits

Fig. S9. Ni oxidation state composition trends of NCM712/811 and NCMA712/811 from the linear combination fitting of spectra in Fig. S2 and S8.

Fig. S10. Ni- $L_3$  TEY spectra of NR-NCMA and their fits

Fig. S11. Additional mRIXS spectra of NR-NCMA at various states of charge

Fig. S12. The summed O- $K$  RIXS cuts of NR-NCMA for different cut-off voltage conditions

Fig. S13. Full-range ND patterns of NR-NCM & NR-NCMA for the first and tenth charged states

#### Tables S1-S3

Table S1. The elemental composition of NR-NCMs and NR-NCMA analyzed by ICP-OES

Table S2. Parameters from Rietveld refinement of neutron diffraction patterns of NR-NCMs and NR-NCMA

Table S3. Accumulated CO<sub>2</sub>/O<sub>2</sub> gas evolution during the cycling of NR-NCMs and NR-NCMA



## Materials and Methods

### General characterizations (ICP-AES, XRD, ND, SEM)

All cathode materials (NR60, NR70, NR70-Al, NR90, NR90-Al) used in this work are provided by LG Energy Solution. The ICP-AES results were collected with a PerkinElmer OPTIMA 8300 ICP mass spectrometer installed at the National Center for Inter-university Research Facilities (NCIRF) at Seoul National University. X-ray diffraction (XRD) patterns were collected by Rigaku Smartlab X-ray diffractometer equipped with a Cu target and HyPix-3000 detector. Neutron powder diffraction data were collected on the high-resolution powder diffractometer Echidna<sup>1</sup> with neutron wavelength of 1.541 Å. Rietveld refinements of ND patterns were conducted using the TOPAS software. Field emission scanning electron microscopy (FE-SEM) images were obtained on an AIS 2000C scanning electron microscope.

### Electrochemical evaluation of cathodes

The cathode materials are mixed with a carbon additive (acetylene black), binder (KF1100, Kureha corporation), and N-Methylpyrrolidone (Sigma-Aldrich) by mortar and pestle to prepare a slurry. The ratio of active material, carbon additive, and binder is 92:1:7. The slurries are cast on the Al foil by a doctor blade and dried for 5 hours in a vacuum oven at 120 °C. The average areal loading of electrodes was c.a. 10 mg cm<sup>-2</sup>. The electrodes are cut into 12 cm<sup>2</sup> sized rectangle shape, and pouch cells are used for the electrochemical test. 200 μL of 1.3 M LiPF<sub>6</sub> in EC:DEC (1:1 vol.%) and polypropylene separator (Celgard) was used for the cell fabrication. Galvanostatic charge-discharge tests of the cells were performed with a current density of 30 mA g<sup>-1</sup>.

### Ex-situ resonant inelastic X-ray scattering (RIXS)

The O K-edge RIXS spectra were collected by iRIXS endstation at beamline 8.0.1 in Advanced Light Source, Lawrence Berkeley National Laboratory. The ultra-high efficient RIXS spectrometer helps the measurement of RIXS spectra without excessive damage to samples. A homemade transfer kit was used to transfer the species from the Ar-filled glovebox to the measurement chamber to avoid any air exposure to the samples. The RIXS spectra were continuously scanned through the O-K pre-edge region with the excitation energy step size of 0.2 eV and dwelling time of 90 seconds. To minimize beam damage, the specimen was repeatedly moved up and down by 0.5 mm during measurement, and it was confirmed that the spectrum was well averaged due to the long dwelling time. A systematic study shows the moving sample during the measurement effectively relieves the beam damage of the samples.<sup>2</sup> The collected spectra were fabricated to 2D RIXS maps as functions of emission and excitation energies. Further processing, including normalization, cosmic ray removal, etc., has been conducted for the 2D map.

### X-ray Absorption Spectroscopy (XAS)

The Ni and Co L<sub>3</sub>-edge XAS spectra were collected by iRIXS endstation at beamline 8.0.1 in Advanced Light Source, Lawrence Berkeley National Laboratory. The species are transferred in the same way as used for the RIXS experiments. The iRIXS endstation has two channels to collect the total fluorescence yield (TFY) and total electron yield (TEY), and both TFY and TEY signals are collected simultaneously.

### Inverse partial fluorescence yield (iPFY)

Mn- $L_3$  iPFY was extracted through the formula  $iPFY = a/PFY\_O$ , where  $a$  is a normalization coefficient,  $PFY\_O$  is extracted by integrating the fluorescence intensity within the O- $K$  emission energy range (490 to 530 eV) on the Mn- $L_3$  mRIXS. Mn- $L_3$  iPFY was used in this work instead of TFY to avoid the distortion observed in the conventional TFY caused by emission signals from oxygen.

### Operando electrochemical mass spectroscopy (OEMS)

#### Electrode preparation for OEMS experiments

NCM electrodes for *operando* gas measurements were prepared by grinding NCM, acetylene black (Alfa Aesar, 50 % compressed, S.A.  $75 \text{ m}^2 \text{ g}^{-1}$ , bulk density  $80\text{--}120 \text{ g L}^{-1}$ , 99.9%+) and polyvinylidene difluoride (Solvay, Solef 6010/1001) in an 85:8:7 mass ratio with an agate mortar and pestle inside an argon-filled glovebox ( $\text{O}_2$  and  $\text{H}_2\text{O} < 1 \text{ ppm}$ ). N-methyl-2-pyrrolidone (NMP, 99.5%, anhydrous, Sigma-Aldrich) was added to form a slurry, which was drop-cast onto stainless-steel mesh discs ( $12 \text{ mm } \varnothing$ ;  $1.13 \text{ cm}^2$ ). The electrodes were dried first at  $60 \text{ }^\circ\text{C}$  for 2 hours and then at  $120 \text{ }^\circ\text{C}$  under vacuum overnight. The active material loading was  $3.5\text{--}4.5 \text{ mg cm}^{-2}$ .

#### OEMS experiments

For the *operando* gas measurements, a custom-built setup and gas-tight cell, which have been described in detail in previous publications,<sup>3-5</sup> were used.

Custom Swagelok cells were assembled inside an argon-filled glovebox as follows: a lithium foil disc ( $12 \text{ mm } \varnothing$ ), a quartz microfiber separator (Whatman, QM-A;  $12.7 \text{ mm } \varnothing$ ) wetted with  $80 \text{ } \mu\text{L}$  of electrolyte solution, an NMC electrode on stainless-steel mesh current collector ( $12 \text{ mm } \varnothing$ ), a stainless-steel mesh disc ( $12 \text{ mm } \varnothing$ ) and a stainless-steel ring spacer ( $12 \text{ mm } \varnothing$ ) were compressed inside a modified Swagelok cell. The spacer ring creates a headspace ( $\sim 100 \text{ } \mu\text{L}$ ) for gases to accumulate during battery operation.  $1.5 \text{ M LiPF}_6$  in EC was chosen as the electrolyte solution for its low vapor pressure, thus contributing a smaller background signal in the mass spectra compared to electrolyte solutions containing linear alkyl carbonates.

After assembly, the NMC/Li cells were connected to the DEMS equipment and the headspace of the cell was filled with a positive argon pressure ( $\sim 1.45 \text{ bar}$ ). During the electrochemical measurements, the cell headspace was flushed with  $500 \text{ } \mu\text{L}$  of argon by the DEMS instrument every 10 minutes, and any accumulated gases were swept to the mass spectrometer chamber for analysis. The mass spectrometer was calibrated for  $\text{O}_2$  (research grade, Linde) and  $\text{CO}_2$  ( $> 99.9\%$ , Linde), allowing for the conversion of the ion current to partial pressure for  $\text{O}_2$  and  $\text{CO}_2$ , which could then be used to quantify the gas formation using the ideal gas law (temperature and volume are known).

Electrochemical measurements were performed at  $25 \text{ }^\circ\text{C}$  using a Biologic VSP potentiostat/galvanostat instrument running EC-lab software. After a 2-hour OCV period to establish a baseline value for all mass traces, the NMC/Li cells were cycled between  $4.8\text{--}3.0 \text{ V}_{\text{cell}}$ . Charging was performed at  $C/10$  in constant current-constant voltage (CCCV) mode with a current limitation corresponding to  $C/100$ , and discharging was performed at  $C/5$  in constant current (CC) mode.

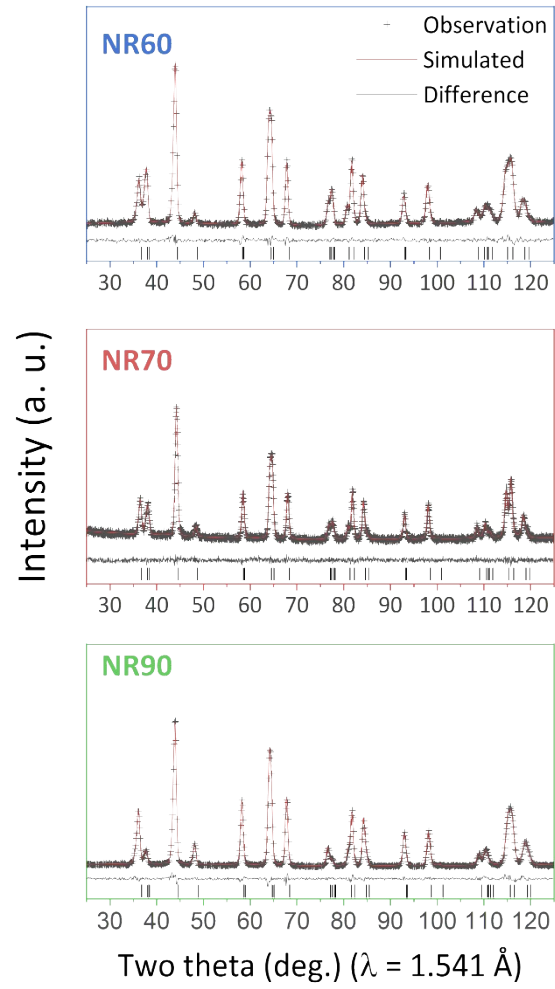

**Fig. S1.**  
Rietveld refinement results of neutron diffraction patterns of NR-NCMs



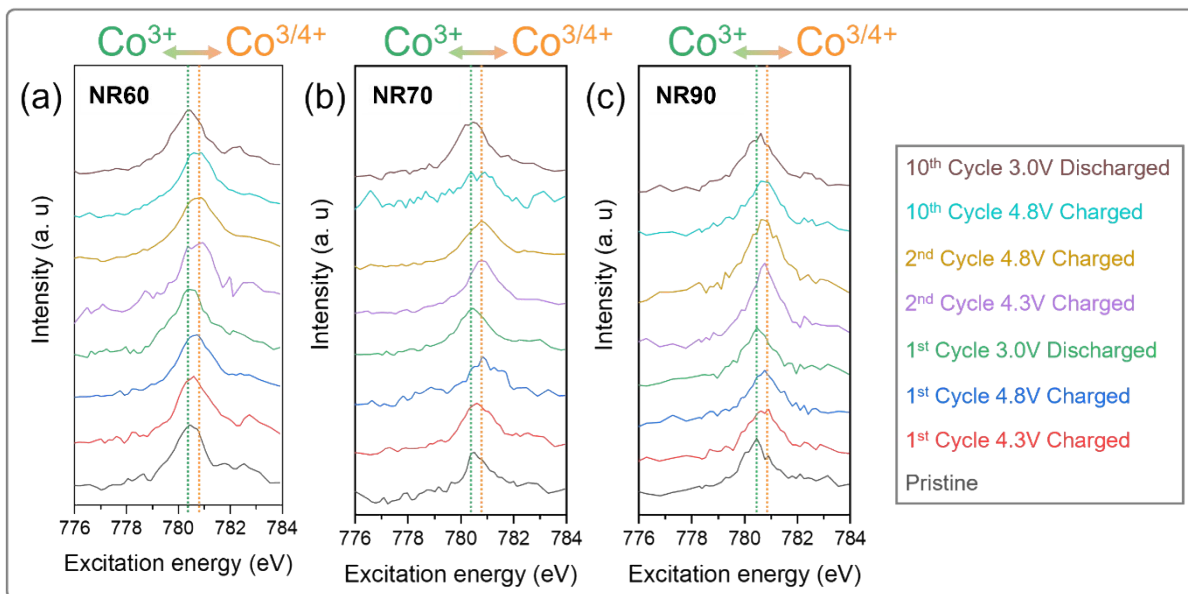

**Fig. S3.**

Co- $L_3$  TEY analyses results of NR-NCMs. Soft X-ray absorption spectra of a-c Co  $L_3$ -edge collected by total fluorescence yield (TFY) mode.

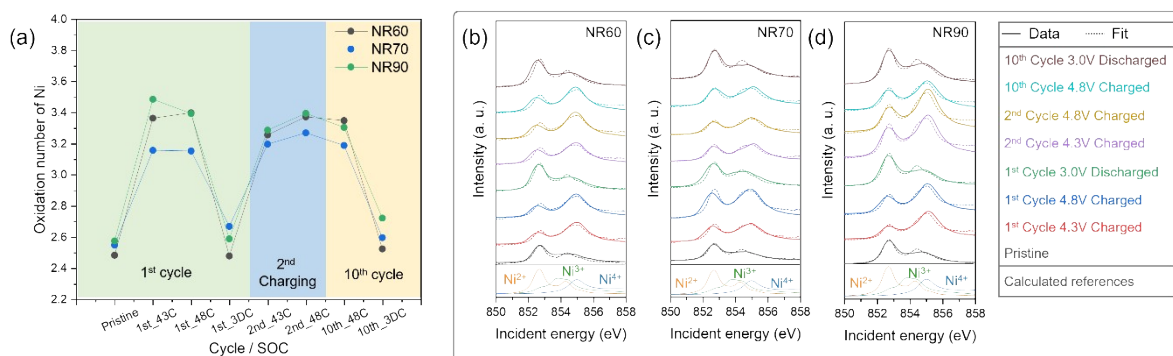

**Fig. S4.**

Ni- $L_3$  TEY analyses results of NR-NCMs. Soft X-ray absorption spectra of (a-d) Ni  $L_3$ -edge collected by total electron yield (TEY) mode. (a) Semi-quantitatively fitted Ni oxidation state trend extracted from Ni- $L_3$  spectra. (b-d) Solid lines and dotted lines correspond to the experimental and fitted values, respectively. The fitted value is generated by the linear combination of the simulated Ni<sup>2+/3+/4+</sup> spectra plotted at the bottom of the boxes.



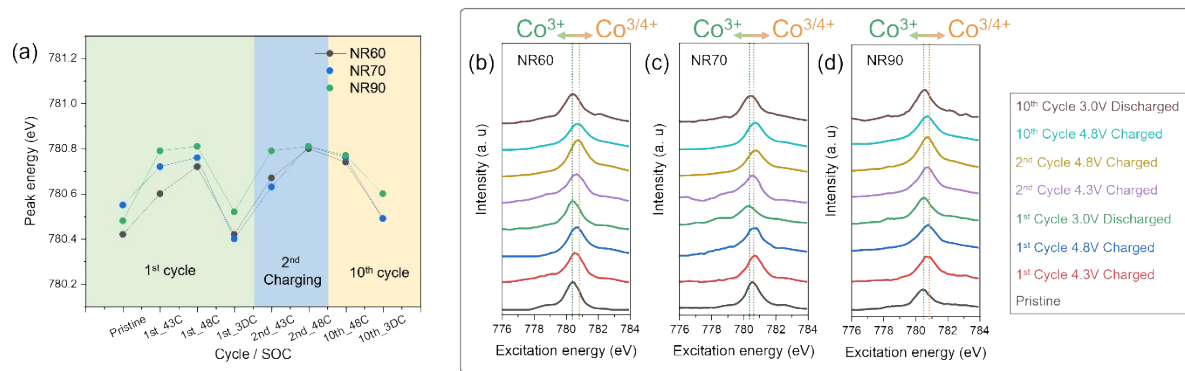

**Fig. S5.**

Co- $L_3$  TEY analyses results of NR-NCMs. Soft X-ray absorption spectra of (a-d) Co  $L_3$ -edge collected by total electron yield (TEY) mode. (a) Co peak energy trend during the cycling extracted from the (b-d) Co  $L_3$ -edge spectra.

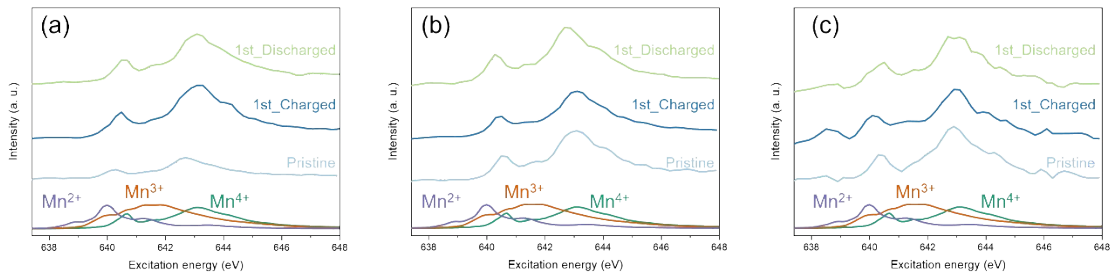

**Fig. S6.**

Mn- $L_3$  iPFY results of NR-NCMs. (a-c) The iPFY spectra extracted from mRIXS spectra for NR60, NR70, NR90, respectively. Each panel includes the spectra at states of charge of pristine, first full charged (4.8 V) and first discharged (3.0 V). The calculated reference spectra for  $Mn^{2+}$ ,  $Mn^{3+}$  and  $Mn^{4+}$  were plotted together for the comparison.<sup>1</sup> The similarity of all spectra with  $Mn^{4+}$  reference indicates that Mn is kept to 4+ regardless of the material and the state of charge.

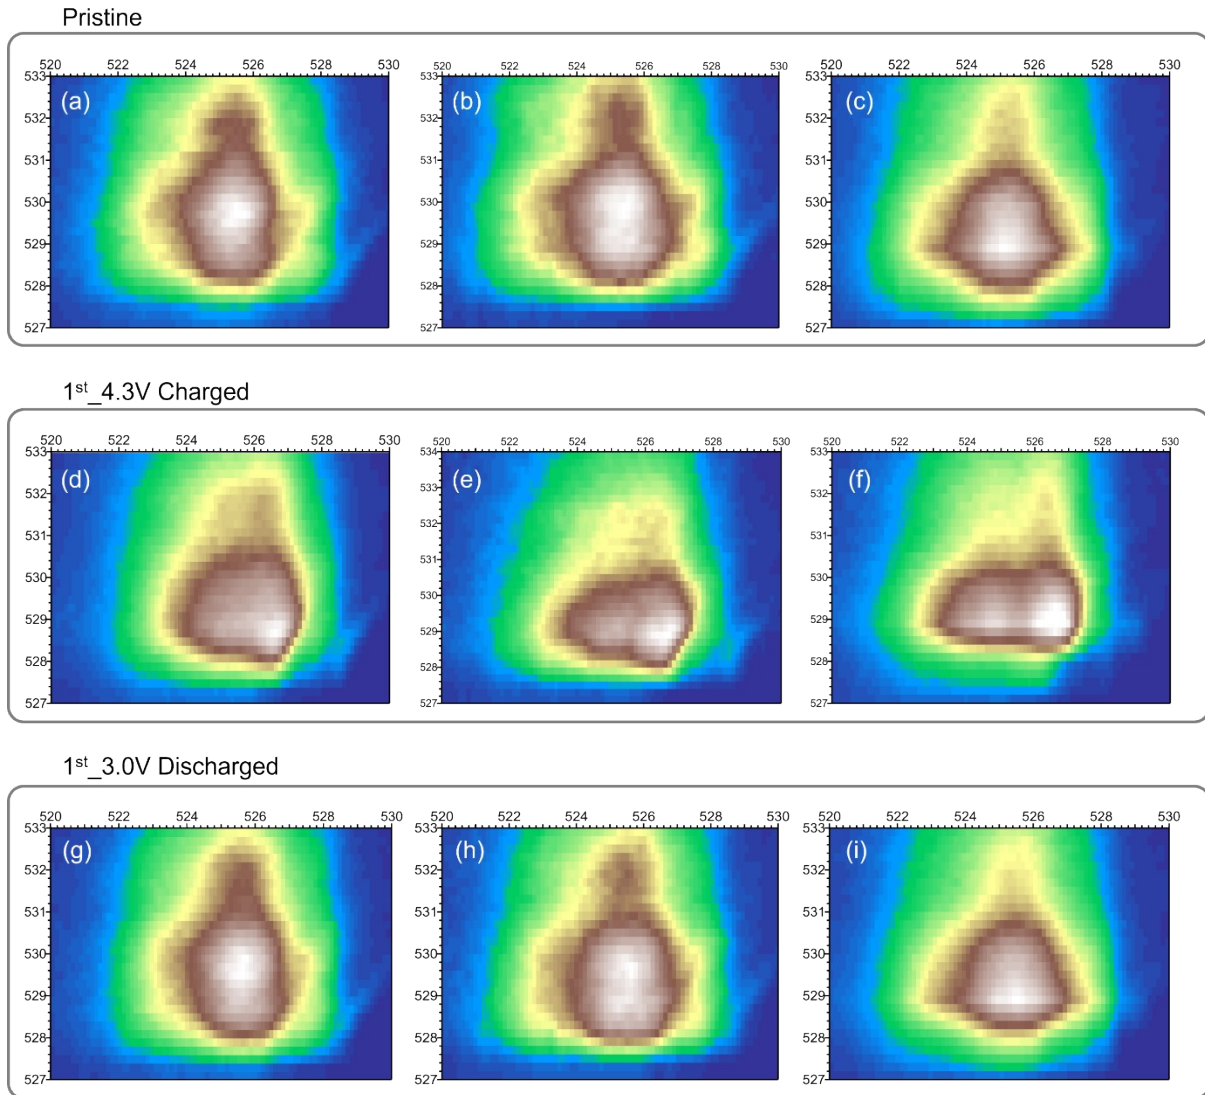

**Fig. S7.**

Additional mRIXS spectra of NR-NCMs at various states of charge: (a-c) Pristine, (d-f) first 4.3 V charged states and (g-i) first discharged states. (a, d, g) NR60, (b, e, h) NR70 and (c, f, i) NR90, respectively.

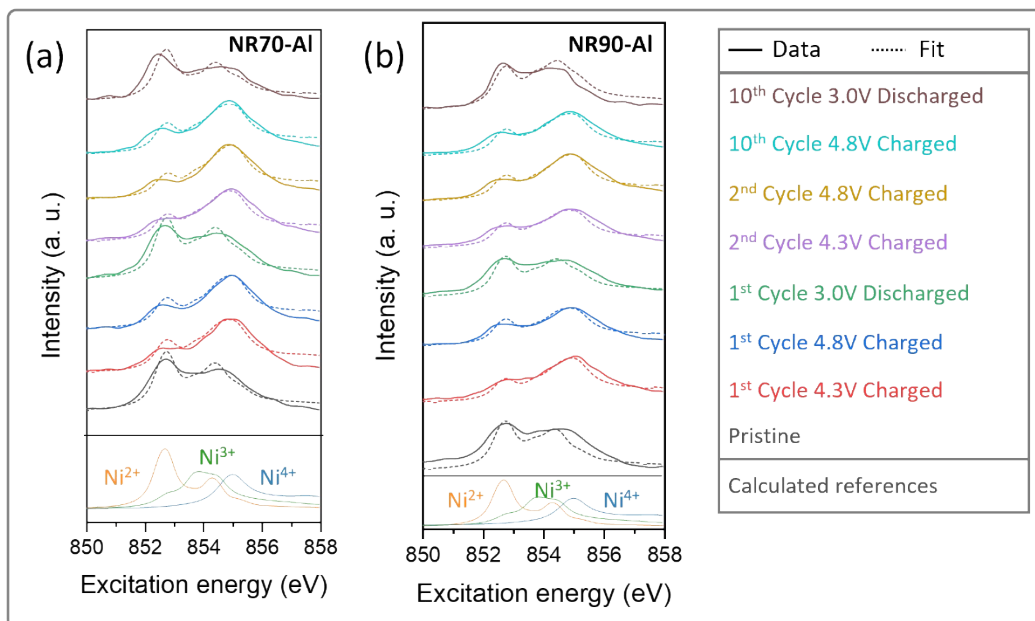

**Fig. S8.**

Ni- $L_3$  TFY analyses results of NR-NCMA. Soft X-ray absorption spectra of **a, b** Ni  $L_3$ -edge collected by total fluorescence yield (TFY) mode. Solid lines and dotted lines correspond to the experimental and fitted values, respectively. The fitted value is generated by the linear combination of the simulated Ni<sup>2+/3+/4+</sup> spectra plotted at the bottom of the boxes.

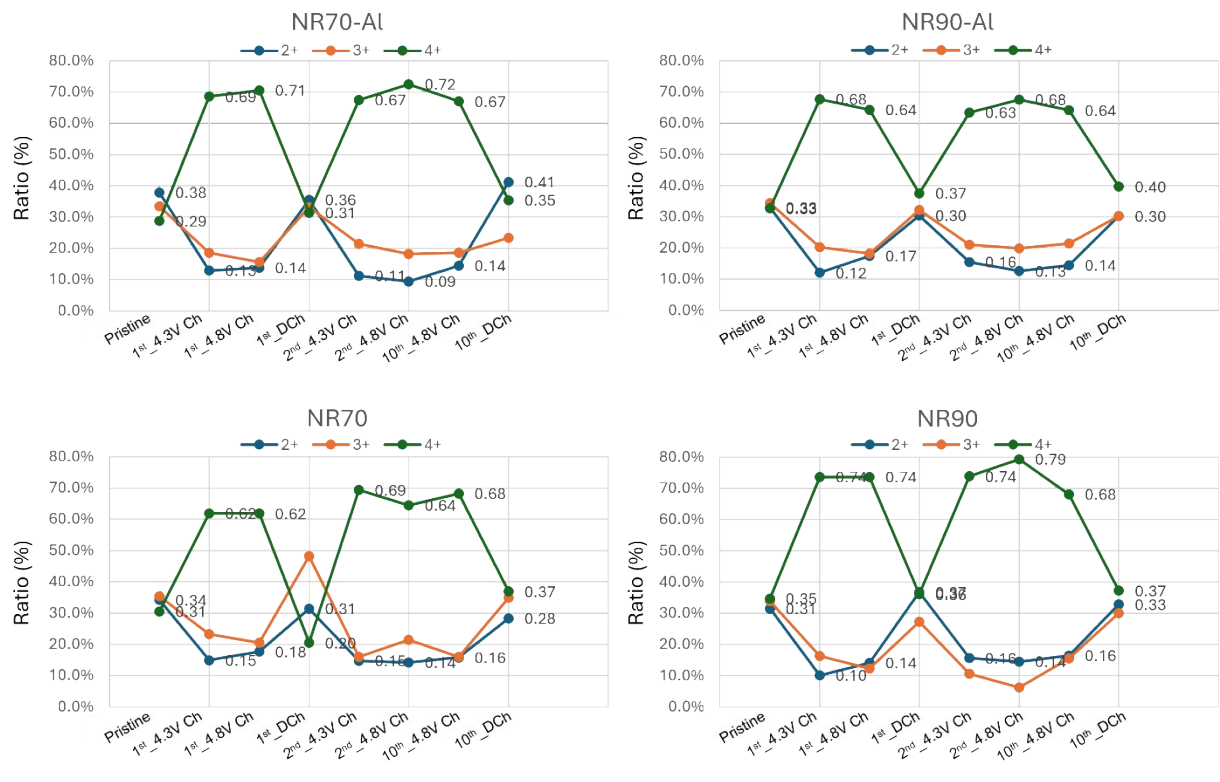

**Fig. S9.**

Ni oxidation state composition trends of NCM712/811 and NCMA712/811 from the linear combination fitting of spectra in Fig. S2 and S8.

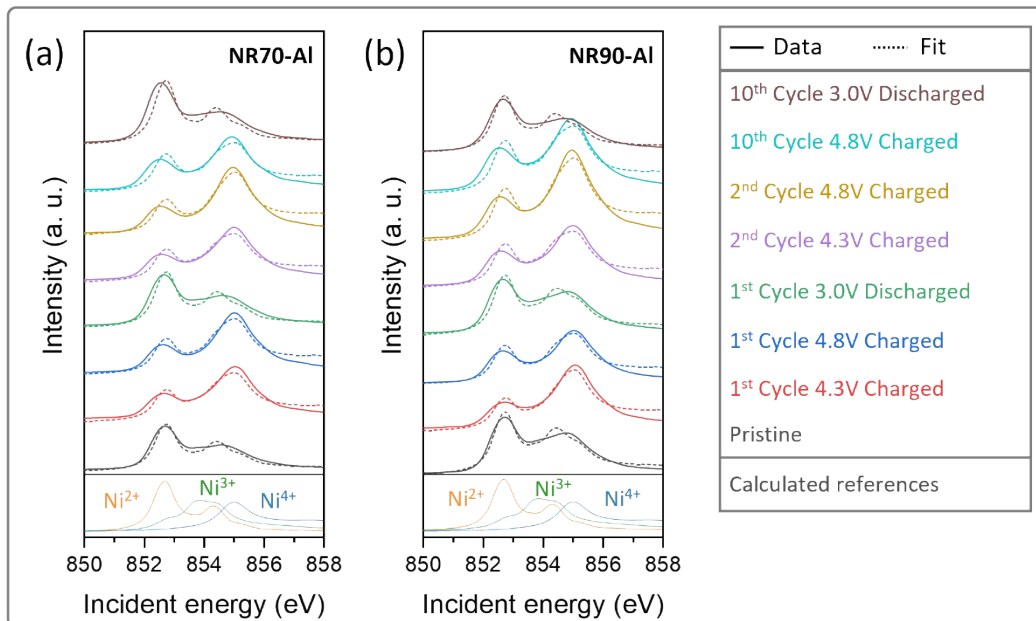

**Fig. S10.**

Ni- $L_3$  TEY analyses results of NR-NCMA. Soft X-ray absorption spectra of **a, b** Ni  $L_3$ -edge collected by total fluorescence yield (TEY) mode. Solid lines and dotted lines correspond to the experimental and fitted values, respectively. The fitted value is generated by the linear combination of the simulated  $Ni^{2+/3+/4+}$  spectra plotted at the bottom of the boxes.

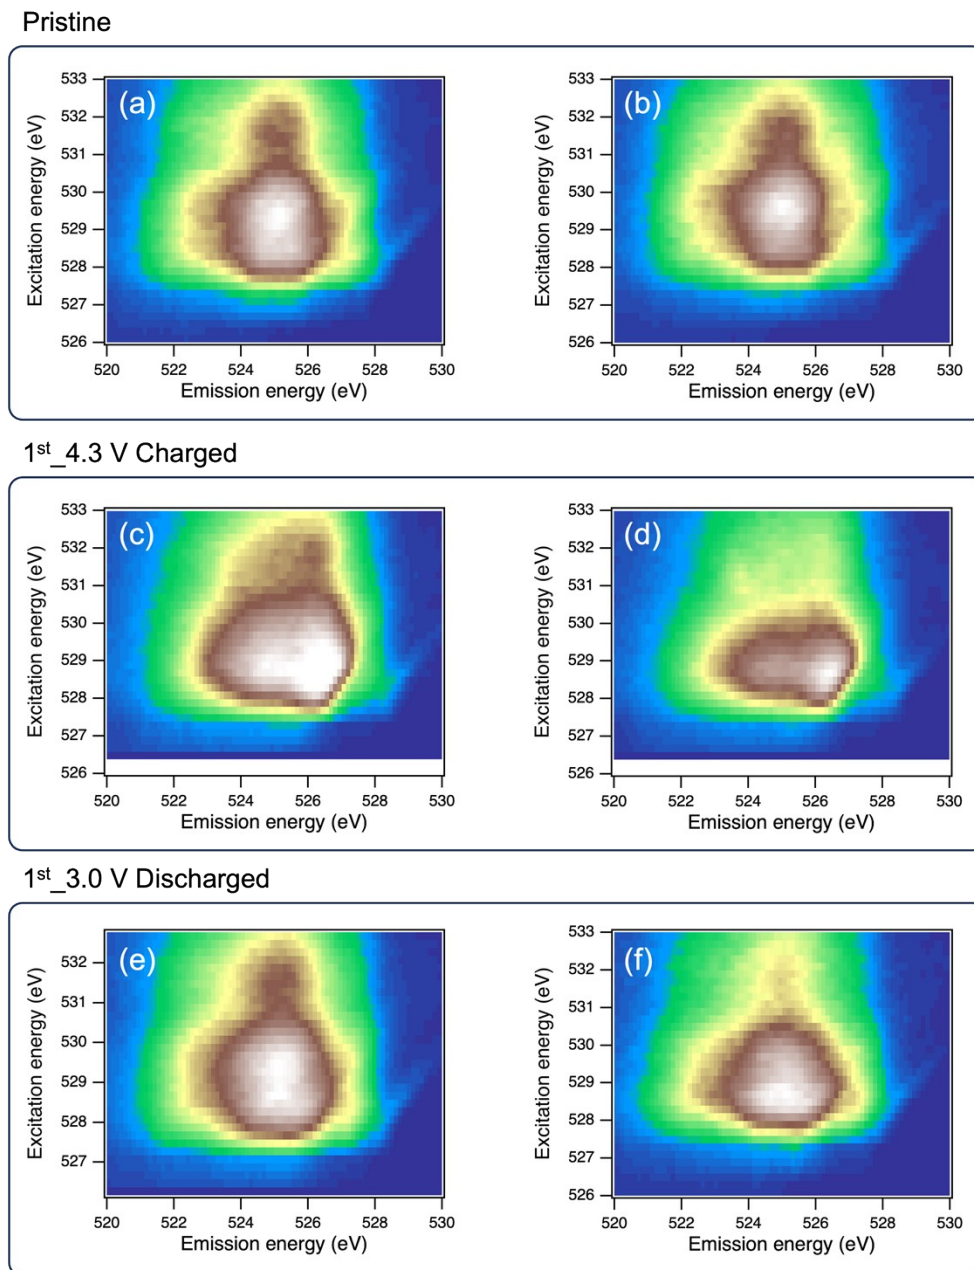

**Fig. S11.**

Additional mRIXS spectra of NR-NCMA at various states of charge: (a, b) Pristine, (c,d) first 4.3 V charged states and (e, f) first discharged states. (a, c, e) NR70-Al, (b, d, f) NR90-Al, respectively.

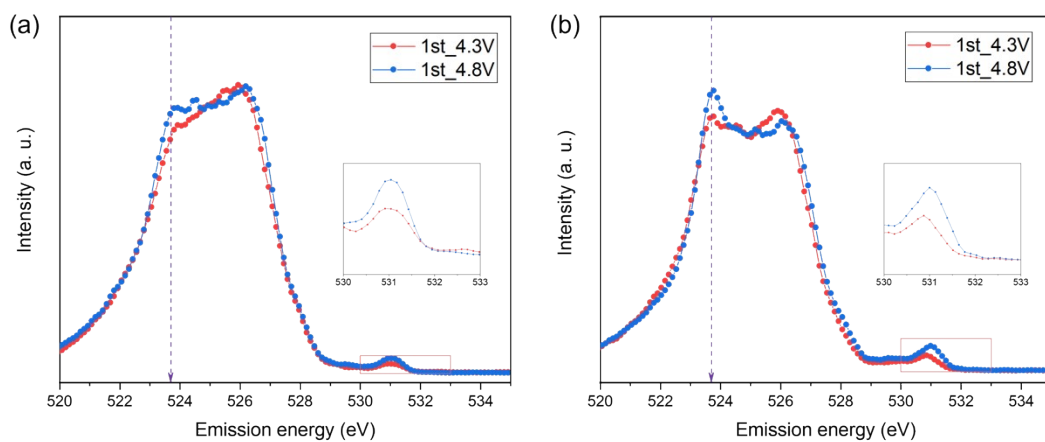

**Fig. S12.**

The summed O-*K* RIXS cuts of NR-NCMA in the excitation energy of 530.9 – 531.3 eV at the first cycle with different voltage cut-offs. (a) NR70-Al (b) NR90-Al. The red box highlights the low energy emission features near the elastic lines arising from the oxygen redox.



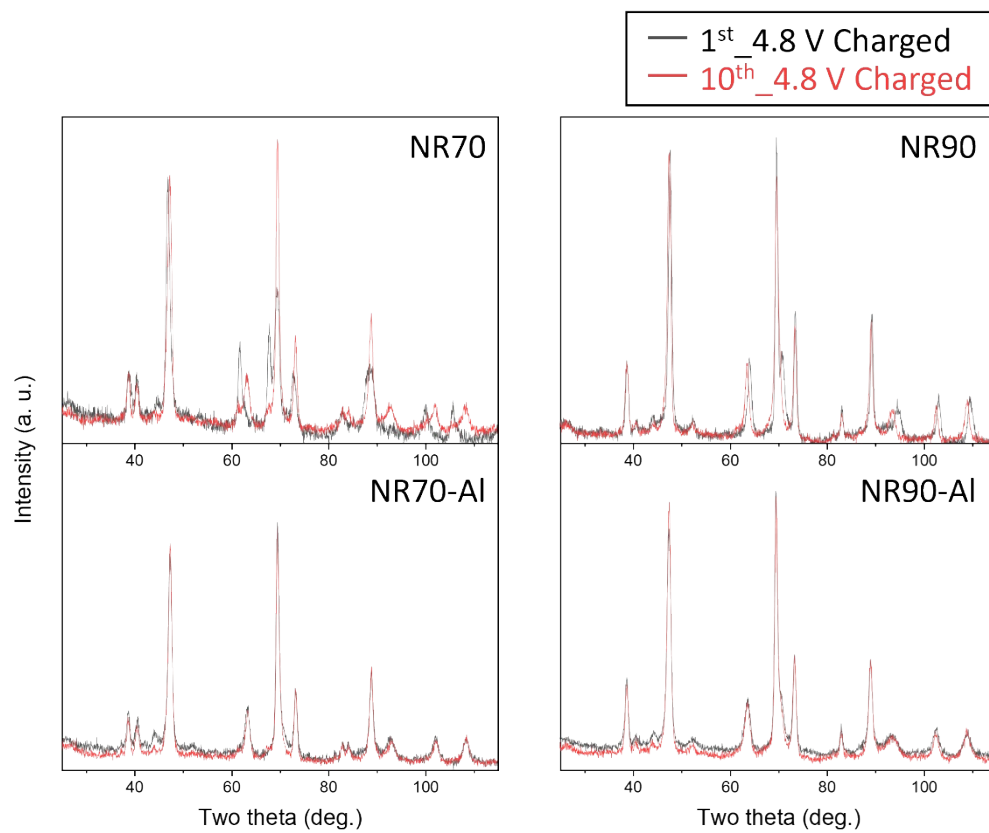

**Fig. S13.**

Full-range ND patterns of NR-NCMs & NR-NCMA for the first and tenth charged states.

| Samples | Elemental composition |      |      |      |       |
|---------|-----------------------|------|------|------|-------|
|         | Li                    | Ni   | Co   | Mn   | Al    |
| NR60    | 0.99                  | 0.62 | 0.19 | 0.19 | N/A   |
| NR70    | 1.00                  | 0.72 | 0.09 | 0.19 | N/A   |
| NR70-Al | 0.98                  | 0.73 | 0.09 | 0.19 | 0.007 |
| NR90    | 0.97                  | 0.87 | 0.1  | 0.06 | N/A   |
| NR90-Al | 0.98                  | 0.89 | 0.05 | 0.07 | 0.019 |

\*Similar levels of impurities (> 2000 ppm) like Zr and B are detected through all samples

**Table S1.**

The elemental composition of NR-NCMs and NR-NCMAAs analyzed by ICP-OES

---

**NR60** (space group:  $R\bar{3}m$ )

---

 $R_{wp} = 3.67\%$ ,  $R_e = 1.49\%$ ,  $R_p = 2.99\%$ ,  $S (= R_{wp}/R_e) = 2.46$ Lattice parameters:  $a = b = 2.86797(15) \text{ \AA}$ ,  $c = 14.2172(10) \text{ \AA}$ ,  $\alpha = \beta = 90^\circ$ ,  $\gamma = 120^\circ$ 

---

| Atom | Site | x | y | z           | Occupancy | $B_{iso} (\text{ \AA}^2)$ |
|------|------|---|---|-------------|-----------|---------------------------|
| Ni   | 3a   | 0 | 0 | 0           | 0.576(2)  | 0                         |
| Co   | 3a   | 0 | 0 | 0           | 0.210(6)  | 0                         |
| Mn   | 3a   | 0 | 0 | 0           | 0.194(10) | 0                         |
| Li   | 3a   | 0 | 0 | 0           | 0.020(12) | 0                         |
| Li2  | 3b   | 0 | 0 | 0.5         | 1         | 0                         |
| O    | 6c   | 0 | 0 | 0.25881(10) | 1         | 0                         |

---

---

**NR70** (space group:  $R\bar{3}m$ )

---

 $R_{wp} = 2.90\%$ ,  $R_e = 2.24\%$ ,  $R_p = 2.34\%$ ,  $S (= R_{wp}/R_e) = 1.30$ Lattice parameters:  $a = b = 2.87326(3) \text{ \AA}$ ,  $c = 14.22389(19) \text{ \AA}$ ,  $\alpha = \beta = 90^\circ$ ,  $\gamma = 120^\circ$ 

---

| Atom | Site | x | y | z           | Occupancy | $B_{iso} (\text{ \AA}^2)$ |
|------|------|---|---|-------------|-----------|---------------------------|
| Ni   | 3a   | 0 | 0 | 0           | 0.646(2)  | 0                         |
| Co   | 3a   | 0 | 0 | 0           | 0.102(6)  | 0                         |
| Mn   | 3a   | 0 | 0 | 0           | 0.161(10) | 0                         |
| Li   | 3a   | 0 | 0 | 0           | 0.091(12) | 0                         |
| Li2  | 3b   | 0 | 0 | 0.5         | 0.956     | 0                         |
| Ni2  | 3b   | 0 | 0 | 0.5         | 0.044(12) |                           |
| O    | 6c   | 0 | 0 | 0.25881(10) | 1         | 0                         |

---

---

**NR70-AI** (space group:  $R\bar{3}m$ )

---

 $R_{wp} = 3.86\%$ ,  $R_e = 1.47\%$ ,  $R_p = 3.17\%$ ,  $S (= R_{wp}/R_e) = 2.63$ Lattice parameters:  $a = b = 2.86568(19) \text{ \AA}$ ,  $c = 14.1868(10) \text{ \AA}$ ,  $\alpha = \beta = 90^\circ$ ,  $\gamma = 120^\circ$ 

---

| Atom | Site | x | y | z | Occupancy | $B_{iso} (\text{ \AA}^2)$ |
|------|------|---|---|---|-----------|---------------------------|
|------|------|---|---|---|-----------|---------------------------|

---

|            |    |   |   |             |            |   |
|------------|----|---|---|-------------|------------|---|
| <b>Ni</b>  | 3a | 0 | 0 | 0           | 0.671(1)   | 0 |
| <b>Co</b>  | 3a | 0 | 0 | 0           | 0.0787(9)  | 0 |
| <b>Mn</b>  | 3a | 0 | 0 | 0           | 0.2483(2)  | 0 |
| <b>Li</b>  | 3a | 0 | 0 | 0           | 0.0015(15) | 0 |
| <b>Li2</b> | 3b | 0 | 0 | 0.5         | 1          | 0 |
| <b>O</b>   | 6c | 0 | 0 | 0.25869(12) | 1          | 0 |

---

**NR90** (space group:  $R\bar{3}m$ )

---

$R_{wp} = 4.66\%$ ,  $R_e = 1.31\%$ ,  $R_p = 3.77\%$ ,  $S (= R_{wp}/R_e) = 3.56$

Lattice parameters:  $a = b = 2.86320(20)$  Å,  $c = 14.1526(11)$  Å,  $\alpha = \beta = 90^\circ$ ,  $\gamma = 120^\circ$

| Atom       | Site | x | y | z           | Occupancy | $B_{iso}$ (Å <sup>2</sup> ) |
|------------|------|---|---|-------------|-----------|-----------------------------|
| <b>Ni</b>  | 3a   | 0 | 0 | 0           | 0.804(2)  | 0                           |
| <b>Co</b>  | 3a   | 0 | 0 | 0           | 0.152(5)  | 0                           |
| <b>Mn</b>  | 3a   | 0 | 0 | 0           | 0.044(5)  | 0                           |
| <b>Li</b>  | 3a   | 0 | 0 | 0           | 0         | 0                           |
| <b>Li2</b> | 3b   | 0 | 0 | 0.5         | 0.981(5)  | 0                           |
| <b>Ni2</b> | 3b   | 0 | 0 | 0.5         | 0.019(5)  | 0                           |
| <b>O</b>   | 6c   | 0 | 0 | 0.25881(10) | 1         | 0                           |

---

**NR90-AI** (space group:  $R\bar{3}m$ )

---

$R_{wp} = 3.92\%$ ,  $R_e = 1.59\%$ ,  $R_p = 3.10\%$ ,  $S (= R_{wp}/R_e) = 2.47$

Lattice parameters:  $a = b = 2.86973(0)$  Å,  $c = 14.22726(0)$  Å,  $\alpha = \beta = 90^\circ$ ,  $\gamma = 120^\circ$

| Atom      | Site | x | y | z | Occupancy | $B_{iso}$ (Å <sup>2</sup> ) |
|-----------|------|---|---|---|-----------|-----------------------------|
| <b>Ni</b> | 3a   | 0 | 0 | 0 | 0.788(4)  | 0                           |
| <b>Co</b> | 3a   | 0 | 0 | 0 | 0.030(20) | 0                           |
| <b>Mn</b> | 3a   | 0 | 0 | 0 | 0.093(14) | 0                           |

|            |    |   |   |             |            |   |
|------------|----|---|---|-------------|------------|---|
| <b>Al</b>  | 3a | 0 | 0 | 0           | 0.0090(12) | 0 |
| <b>Li2</b> | 3b | 0 | 0 | 0.5         | 0.981(5)   | 0 |
| <b>Ni2</b> | 3b | 0 | 0 | 0.5         | 0.019(5)   | 0 |
| <b>O</b>   | 6c | 0 | 0 | 0.25881(10) | 1          | 0 |

**Table S2.**

Parameters from Rietveld refinement of neutron diffraction patterns of NR-NCMs and NR-NCMA

| NR60    | O <sub>2</sub> (μmol g <sup>-1</sup> ) | CO <sub>2</sub> (μmol g <sup>-1</sup> ) |
|---------|----------------------------------------|-----------------------------------------|
| Cycle 1 | 2.0041                                 | 104.3826                                |
| Cycle 2 | 0.2671                                 | 68.11                                   |

  

| NR70    | O <sub>2</sub> (μmol g <sup>-1</sup> ) | CO <sub>2</sub> (μmol g <sup>-1</sup> ) |
|---------|----------------------------------------|-----------------------------------------|
| Cycle 1 | 1.9817                                 | 113.3374                                |
| Cycle 2 | 0.9077                                 | 75.7738                                 |

  

| NR70-A1 | O <sub>2</sub> (μmol g <sup>-1</sup> ) | CO <sub>2</sub> (μmol g <sup>-1</sup> ) |
|---------|----------------------------------------|-----------------------------------------|
| Cycle 1 | 1.4933                                 | 84.3190                                 |
| Cycle 2 | 0.5023                                 | 58.1831                                 |

  

| NR90    | O <sub>2</sub> (μmol g <sup>-1</sup> ) | CO <sub>2</sub> (μmol g <sup>-1</sup> ) |
|---------|----------------------------------------|-----------------------------------------|
| Cycle 1 | 1.5739                                 | 118.7847                                |
| Cycle 2 | 0.4572                                 | 72.9226                                 |

  

| NR90-A1 | O <sub>2</sub> (μmol g <sup>-1</sup> ) | CO <sub>2</sub> (μmol g <sup>-1</sup> ) |
|---------|----------------------------------------|-----------------------------------------|
| Cycle 1 | 1.2073                                 | 81.9391                                 |
| Cycle 2 | 0.3577                                 | 53.0161                                 |

**Table S2.**

Accumulated CO<sub>2</sub>/O<sub>2</sub> gas evolution during the cycling of NR-NCMs and NR-NCMAAs

## References

1. M. Avdeev and J. R. Hester, *J. Appl. Crystallogr.*, 2018, **51**, 1597-1604.
2. Q. Li, Z. W. Lebens-Higgins, Y. Li, Y. S. Meng, Y.-D. Chuang, L. F. J. Piper, Z. Liu and Wanli Yang, *J. Phys. Chem. Lett.*, 2021, **12**, 1138-1143.
3. B. D. McCloskey, R. Scheffler, A. Speidel, D. S. Bethune, R. M. Shelby and A. C. Luntz, *J. Am. Chem. Soc.*, 2011, **133**, 18038-18041.
4. B. D. McCloskey, D. S. Bethune, R. M. Shelby, G. Girishkumar and A. C. Luntz, *J. Phys. Chem. Lett.*, 2011, **2**, 1161-1166.
5. B. D. McCloskey, A. Valery, A. C. Luntz, S. R. Gowda, G. M. Wallraff, J. M. Garcia, T. Mori and L. E. Krupp, *J. Phys. Chem. Lett.*, 2013, **4**, 2989-2993.
